# Supplementary material for: Metallo-Glycodendrimeric Materials against Enterotoxigenic Escherichia coli
Source: MDPI journal article supplement (doi:10.3390/microorganisms12050966), 2024-05-11
Supplement: s1 [file s1]

# Metallo-Glycodendrimeric Materials against Enterotoxigenic *Escherichia coli*

Aly El Riz <sup>1,†</sup>, Armelle Tchoumi Neree <sup>2,3,†</sup>, Leila Mousavifar <sup>1</sup>, René Roy <sup>1</sup>, Younes Chorfi <sup>2,3</sup>  
and Mircea Alexandru Mateescu <sup>1,3,\*</sup>

<sup>1</sup> Department of Chemistry, Université du Québec à Montréal, Succ. Centre-Ville, P.O. Box 8888, Montréal, QC H3C 3P8, Canada; el\_riz.aly@courrier.uqam.ca (A.E.R.); leilyanmousavifar@gmail.com (L.M.); roy.rene@uqam.ca (R.R.)

<sup>2</sup> Department of Veterinary Biomedicine Sciences, Faculty of Veterinary Medicine, Université de Montréal, St-Hyacinthe, QC J2S 2M2, Canada; armelle.tchoumi.neree@umontreal.ca (A.T.N.); younes.chorfi@umontreal.ca (Y.C.)

<sup>3</sup> Centre de recherche en infectiologie porcine et avicole (CRIPA), Université de Montréal, St-Hyacinthe, QC J2S 2M2, Canada

\* Correspondence: mateescu.m-alexandru@uqam.ca; Tel.: +1-(514)-987-4319

† These authors contributed equally to this work as first author.

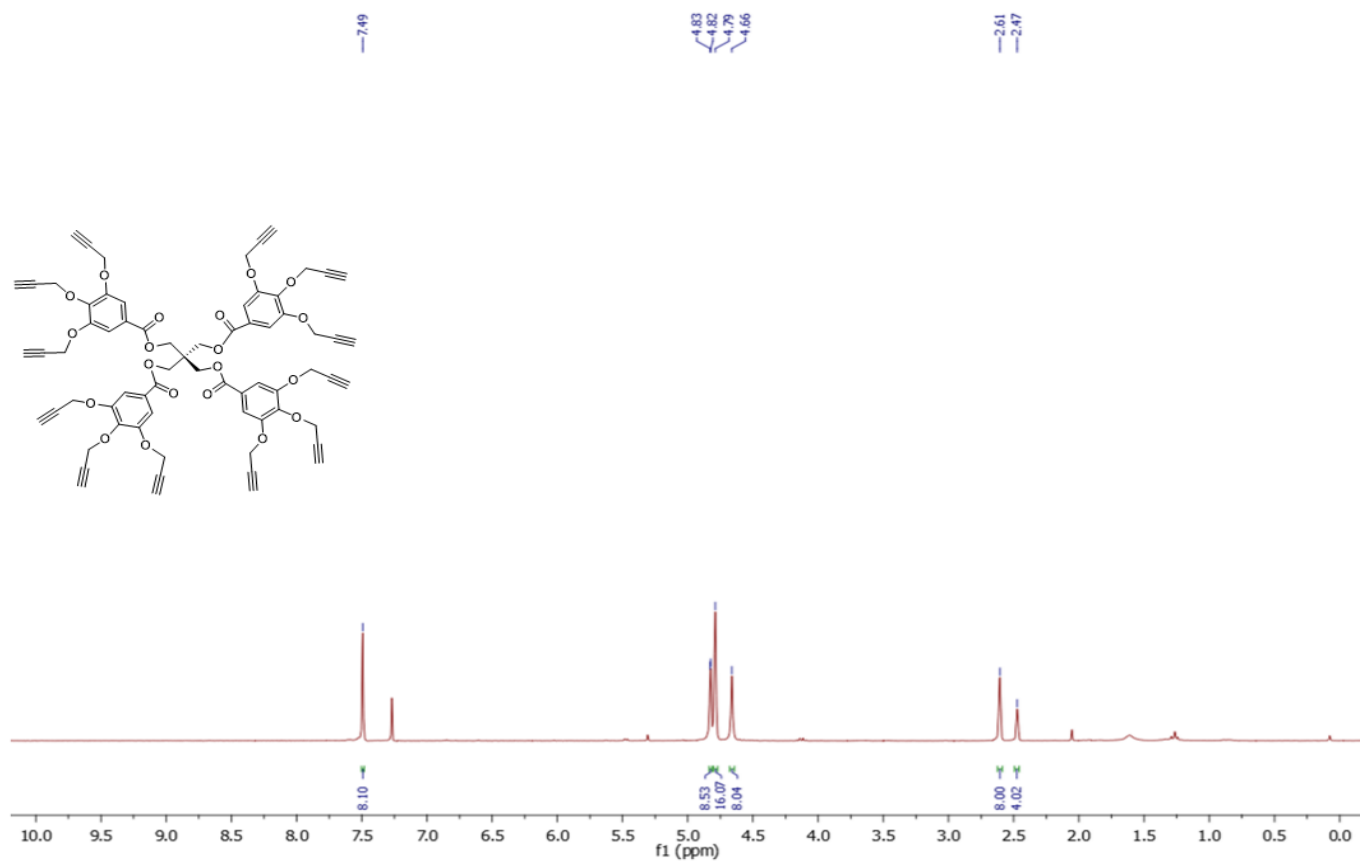

Figure S1. <sup>1</sup>H-NMR (300 MHz, CDCl<sub>3</sub>) of compound 5

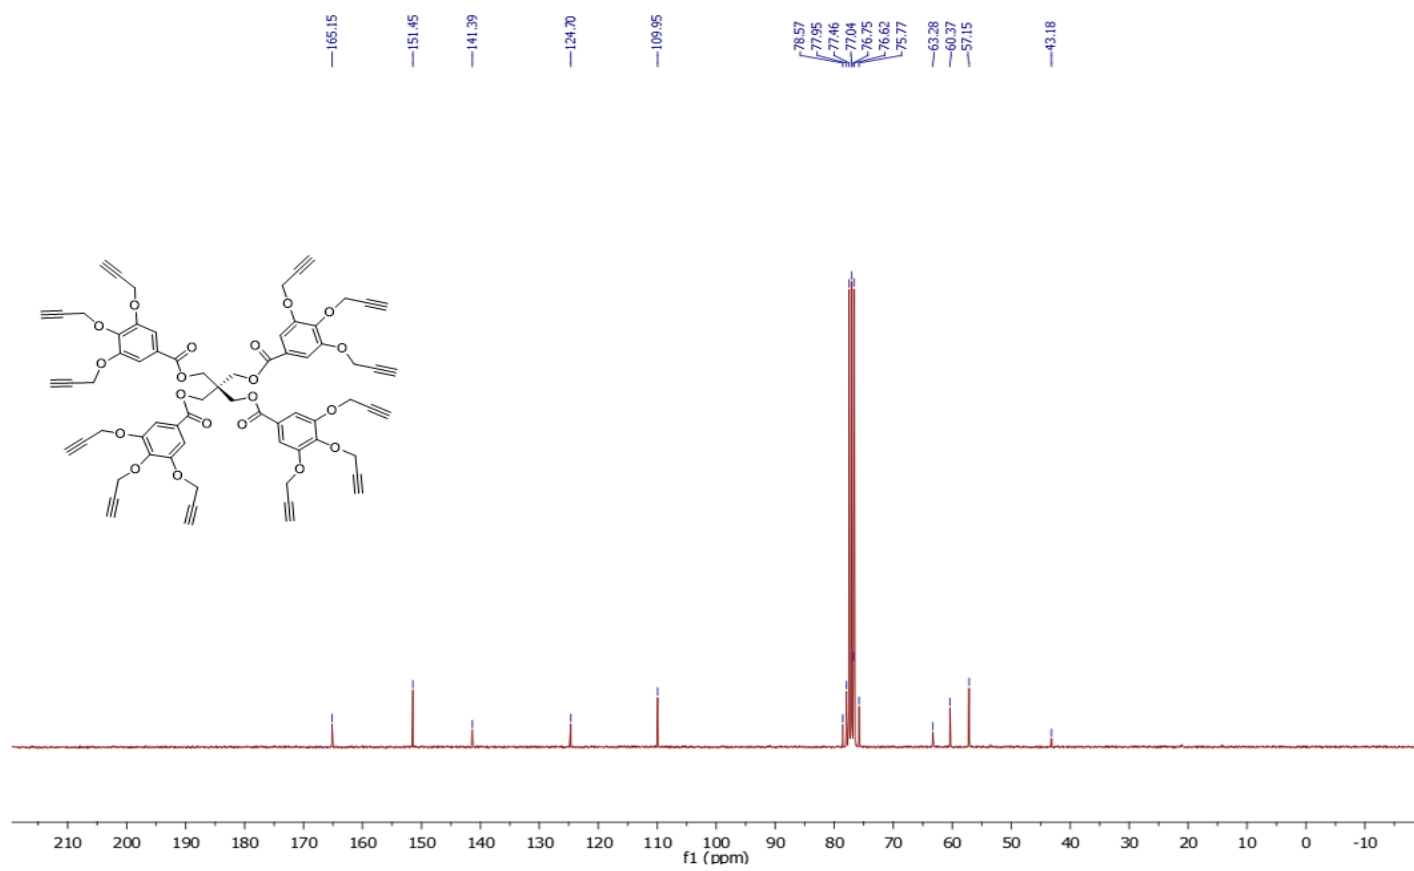

Figure S2.  $^{13}\text{C}$ -NMR (75 MHz,  $\text{CDCl}_3$ ) of compound 5

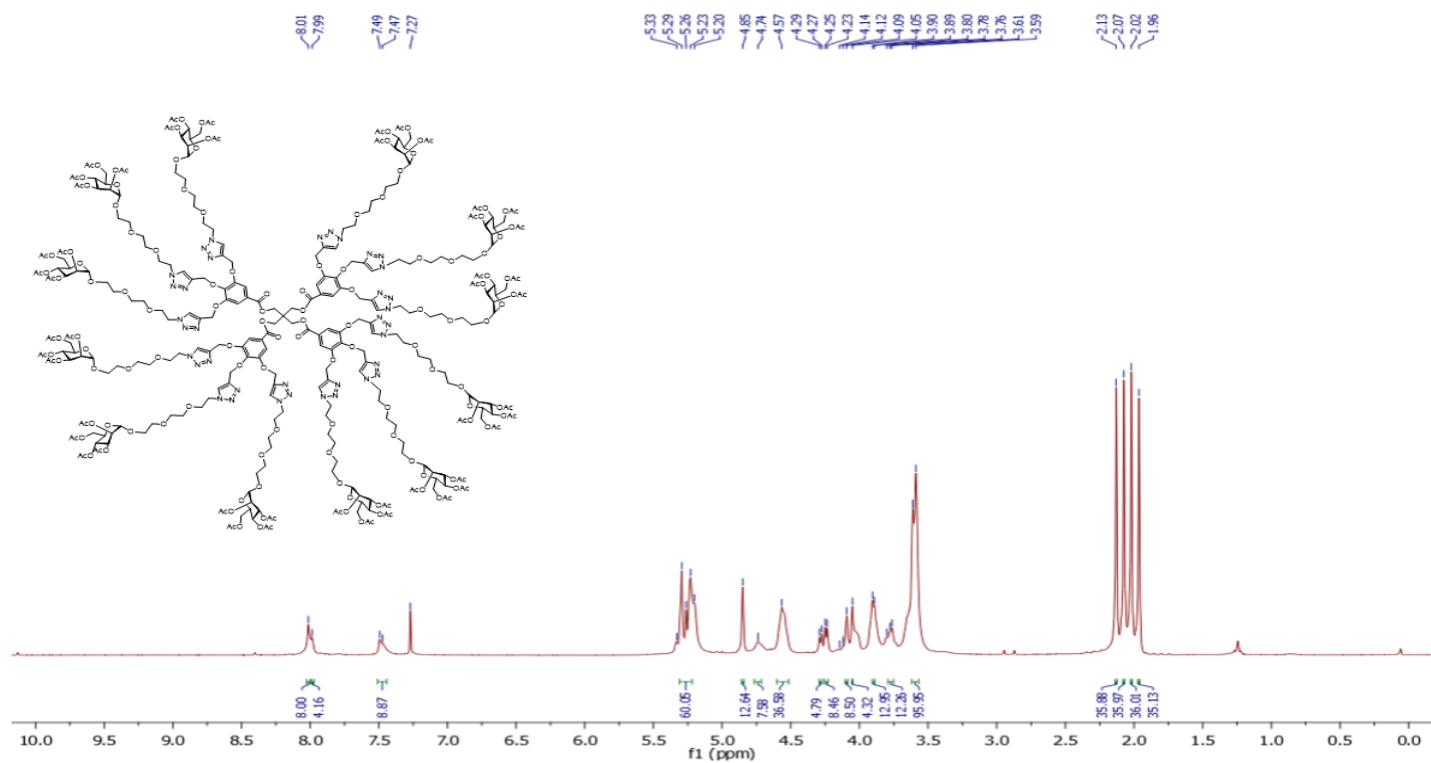

Figure S3.  $^1\text{H}$ -NMR (300 MHz,  $\text{CDCl}_3$ ) of compound 10

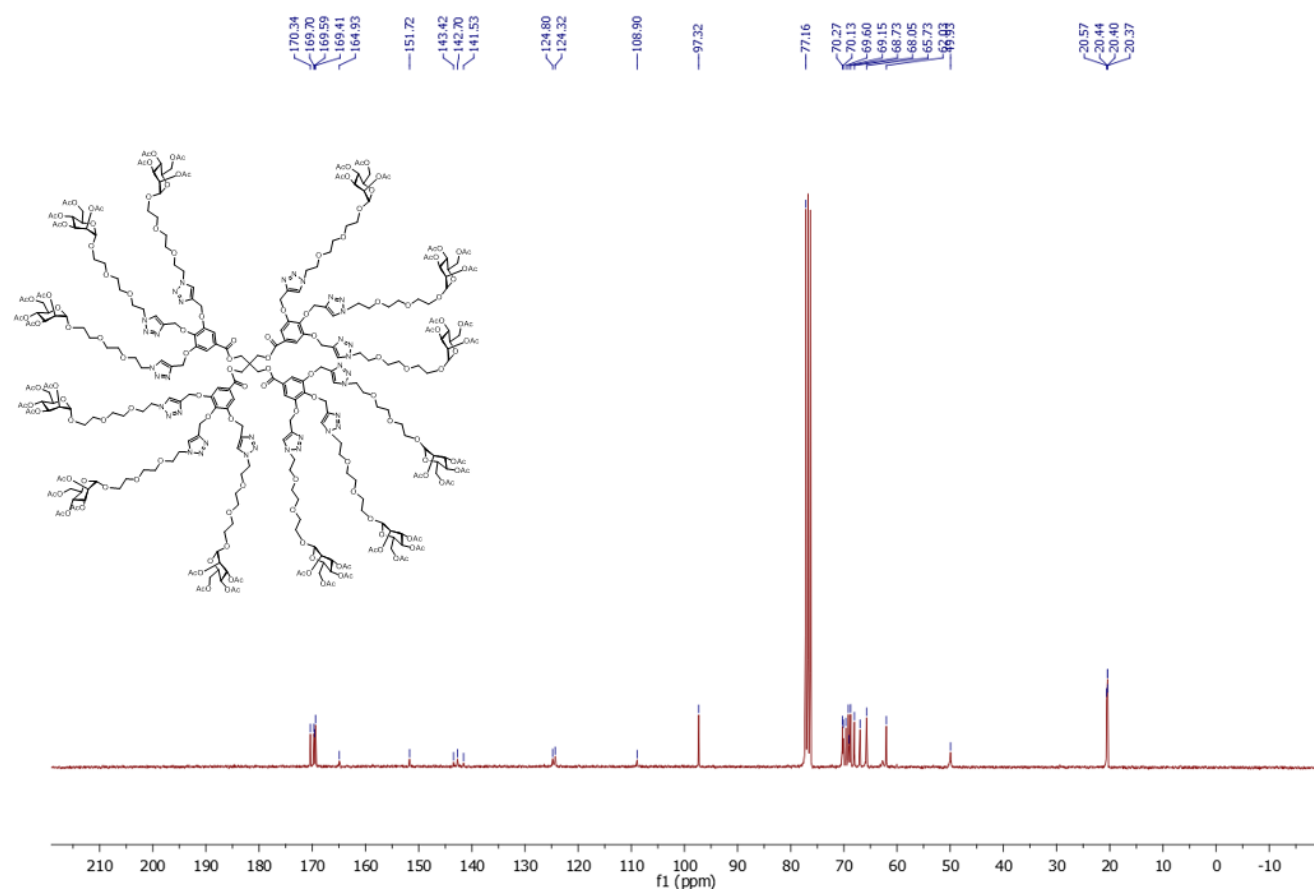

Figure S4.  $^{13}\text{C}$ -NMR (75 MHz,  $\text{CDCl}_3$ ) of compound 10

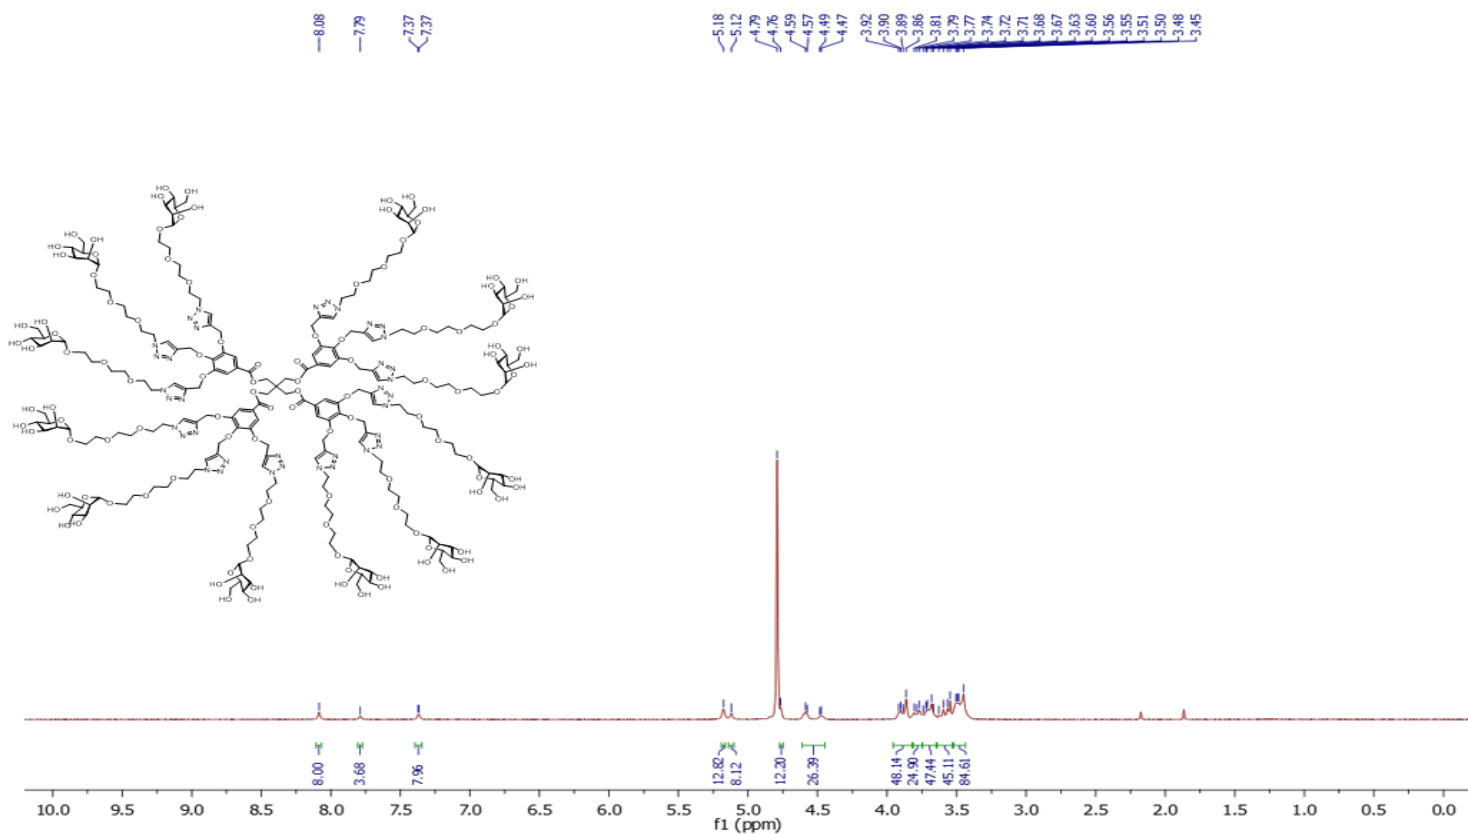

Figure S5. <sup>1</sup>H NMR (300 MHz, D<sub>2</sub>O) of compound 11

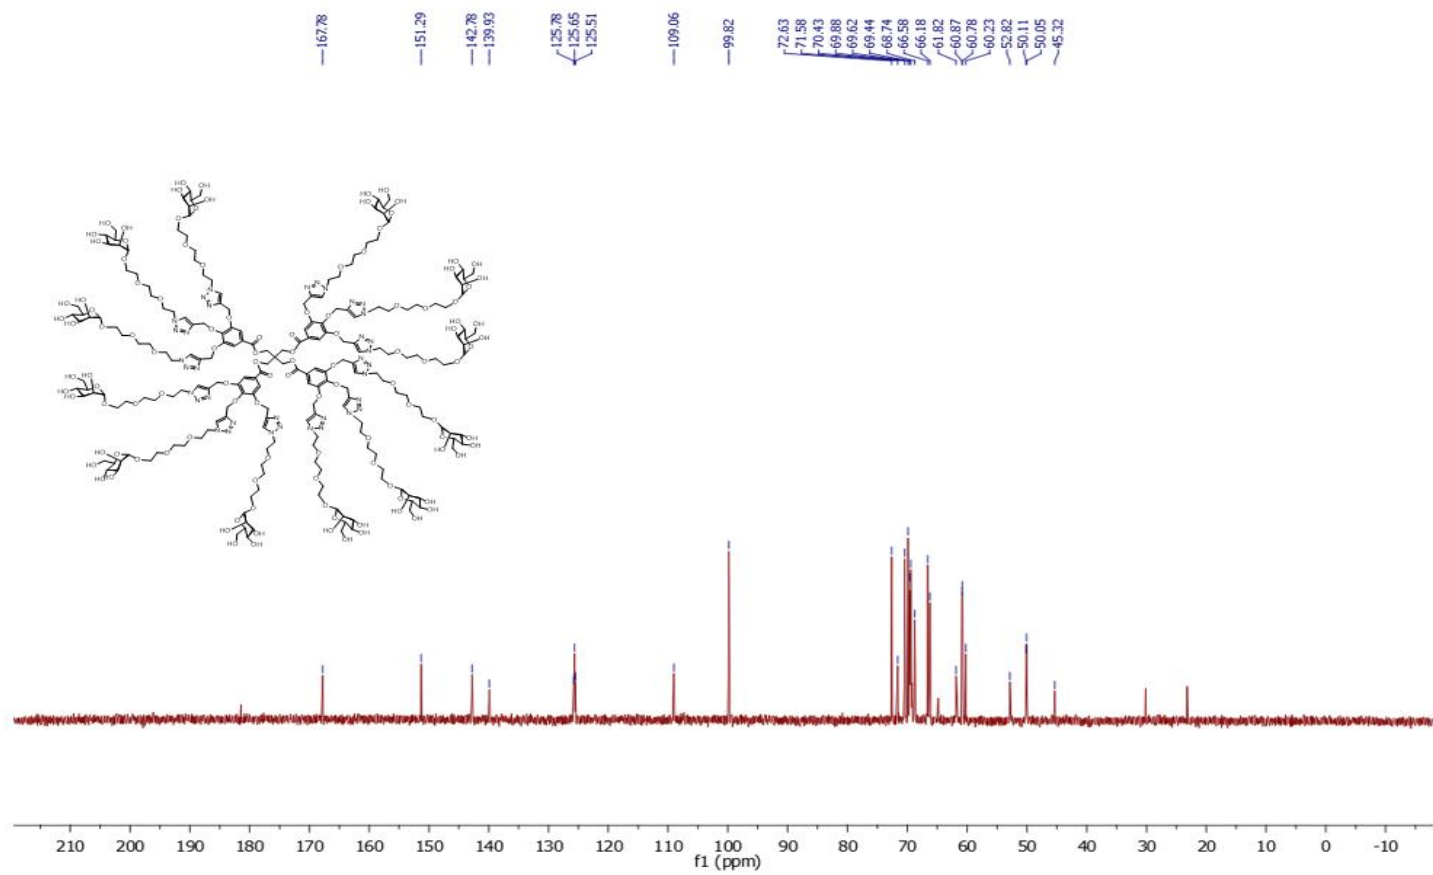

Figure S6.  $^{13}\text{C}$  NMR (75 MHz,  $\text{D}_2\text{O}$ ) of compound 11

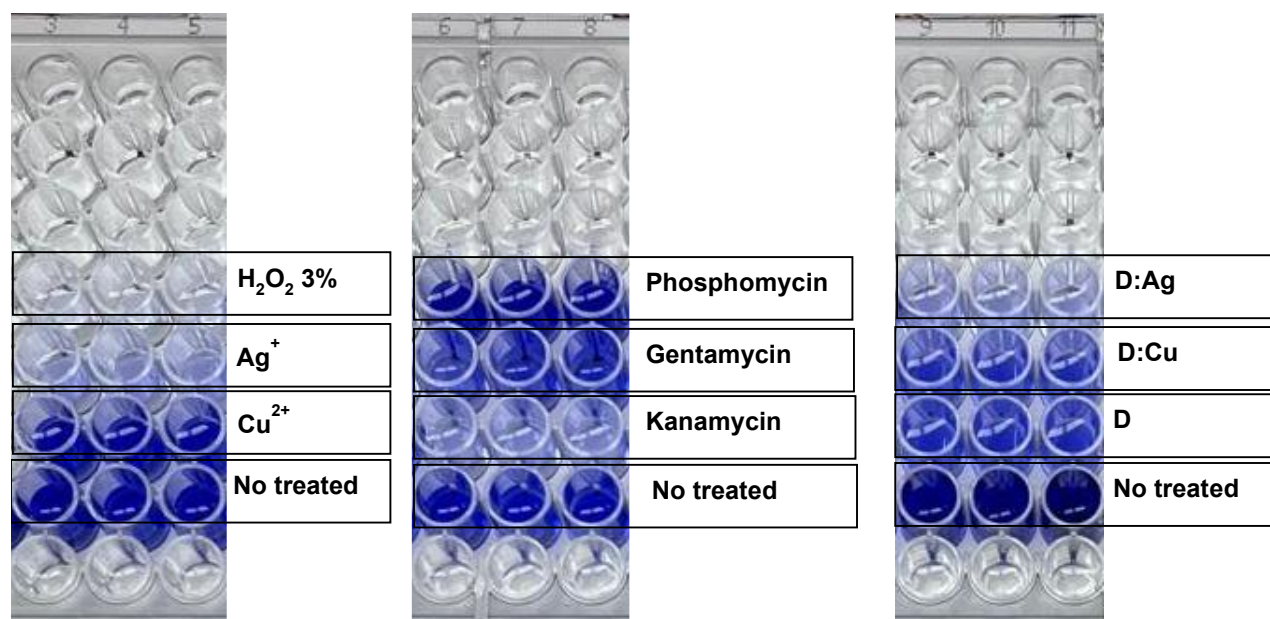

**Figure S7.** Biofilm production capabilities of *E. coli* enterotoxigenic fimbriae 4 (ETEC:F4) in the absence or presence of bactericidal agents by crystal violet Assay.

**Table S1.** Antibiotics effect on ETEC:F4

| Materials                         |                               | Inhibition zone (cm) |
|-----------------------------------|-------------------------------|----------------------|
| Dendrimers                        | D                             | 1.10 ± 0.14          |
|                                   | D:Cu                          | 1.11 ± 0.15          |
|                                   | D:Ag                          | 2.25 ± 0.25          |
| Current used bactericidal agents  | Gentamycin                    | 1.02 ± 0.18          |
|                                   | Phosphomycin                  | 1.04 ± 0.18          |
|                                   | Kanamycin                     | 2.18 ± 0.19          |
| Metal ions                        | Cu <sup>2+</sup>              | 1.35 ± 0.12          |
|                                   | Ag <sup>+</sup>               | 1.35 ± 0.12          |
| Components of dendrimer synthesis | Gallic acid                   | 0.78 ± 0.05          |
|                                   | mannose                       | 0.98 ± 0.13          |
| Positive control                  | H <sub>2</sub> O <sub>2</sub> | 3.15 ± 0.21          |

Average diffusion diameters as growth inhibition of bacteria induced by 1 mg of dendrimeric materials, of current antibacterial agents usually used and of 10 µL of 3% H<sub>2</sub>O<sub>2</sub>
